# Supplementary material for: Cubane-like structure of a silanethiol ? primary amine assembly ? a novel, unusual hydrogen bond patternElectronic supplementary information (ESI) available: experimental details, table with data of hydrogen bonds, Ortep plots in colour of 1, 2 and 3. See http://www.rsc.org/suppdata/cc/b3/b313576d/
Source: Royal Society of Chemistry journal article supplement (doi:10.1039/b313576d), 2004-01-01
Supplement: b313576d.doc [file b313576d.doc]

ELECTRONIC SUPPLEMENTARY INFORMATION

Cubane-Like Structure of a Silanethiol - Primary Amine Assembly – a Novel, Unusual Hydrogen Bond Pattern

Barbara Becker,* Katarzyna Baranowska, Jarosław Chojnacki and Wiesław Wojnowski

*Experimental*

All synthetic procedures were carried out under argon, using standard Schlenk techniques. Tri-*tert*-butoxy­silanethiol [13, 15] and tri-isopropoxysilanethiol [15] were prepared according to literature data. The solvents and amines were dried by standard methods and distilled under argon prior to use. The percentage yields of 1, 2 and 3 were not optimized, however, the yield of polycrystalline products of 80 % or more can be achieved. IR spectra (KBr pellet) of all three compounds with broad N-H stretching vibration bands above 3000 cm-1 indicate the presence of hydrogen bonding.

(Bu*t*O)3SiS(–) (+)NH3Bu*t* 1

*Tert-butylamine (0.2 cm3, 2 mmol) was added to a solution of 0.56 g (2 mmol) of (ButO)3SiSH in 8 cm3 of isopropanol. Small, clear crystals separated after one week at room temperature. They were collected and recrystallized from cold hexane giving small, good quality crystals with a sharp m.p. 98-99 ºC. Found: C, 54.7; H,11.6; N, 3.7; S, 8.8. Calc. for C16H39NO3SSi: C, 54.3; H, 11.1; N, 4.0; S, 9.1.*

(Pr*i*O)3SiS(–) (+)NH3Bu*t* 2

*Tert-butylamine (0.2 cm3, 2 mmol) was added to a solution of 0.512 cm3 (2 mmol) of (PriO)3SiSH in 6 cm3 of toluene. Solution was kept for ca. 1 month at 0-5ºC small and well-shaped crystals with m.p. 128-130 ºC were obtained. Found: C, 50.0; H,10.8; N,4.4; S, 10.0. Calc. for C13H33NO3SSi: C, 50.1; H, 10.7; N, 4.5; S, 10.3.*

[(Bu*t*O)3SiS(–) (+)NH3(CH2)2CH(Me)2]4.C6H5CH3 3

*3-methylbutylamine (2 mmol) was added to a solution of 0.56 g (2 mmol) of (ButO)3SiSH in 8 cm3 of n-hexane. Crystals of (ButO)3SiS(–)(+)NH3(CH2)2CH(Me)2 melting at 74-75 ºC separated from the solution after ca. 2 months at 0-5ºC. Found: C, 55.4; H,11.1; N, 3.6; S, 8.9. Calc. for C17H41NO3SSi: C, 55.5; H, 11.2; N, 3.8; S, 8.7. Recrystallization of the above sample from cold toluene gave the crystals of 3 (toluene solvate)* *used for X-ray measurements.*

Crystal Structure Analysis

All non-hydrogen atoms were refined anisotropically. H atoms bonded to C atoms were treated as riding, with isotropic displacement parameters proportional to relevant parameters of carbon atoms. For 1 and 2 nitrogen-bonded H atoms were located from Fourier maps and refined without constrains. In the case of 3 ammonium H atoms were refined as riding, idealized tetrahedral.

Table 1 Hydrogen bonds in 1, 2 and 3 (standard deviations in parentheses)

| D-H [Å] | H...A [Å] | D...A [Å] | <(DHA) [˚] | D–H…A * |
| --- | --- | --- | --- | --- |
| 1 |  |  |  |  |
| 0.86(4) | 2.46(4) | 3.213(3) | 145(3) | N1-H1A...S1 |
| 0.82(3) | 2.43(3) | 3.239(4) | 170(3) | N1-H1B...S2 |
| 1.05(4) | 2.21(4) | 3.260(3) | 175(3) | N1-H1C...S2’ |
| 0.87(4) | 2.42(4) | 3.273(3) | 168(3) | N2-H2F...S1 |
| 0.87(4) | 2.46(4) | 3.220(3) | 146(3) | N2-H2E...S2 |
| 0.93(4) | 2.33(4) | 3.238(3) | 168(3) | N2-H2D...S1’ |
| 2 |  |  |  |  |
| 0.96(6) | 2.32(7) | 3.249(4) | 163(5) | N1-H1A...S1 |
| 3 |  |  |  |  |
| 0.91 | 2.27 | 3.170(3) | 172.6 | N1-H1A...S1 |
| 0.91 | 2.57 | 3.287(3) | 135.9 | N1-H1B...S2 |
| 0.91 | 2.84 | 3.305(3) | 113.5 | N1-H1B...S3 |
| 0.91 | 2.09 | 2.953(4) | 157.9 | N1-H1C...O8 |
| 0.91 | 2.90 | 3.327(3) | 110.2 | N2-H2D...S2 |
| 0.91 | 2.45 | 3.189(3) | 138.5 | N2-H2D...S3 |
| 0.91 | 2.25 | 3.152(3) | 173.5 | N2-H2C...S4 |
| 0.91 | 1.98 | 2.850(4) | 159.2 | N2-H2E...O4 |
| 0.91 | 2.44 | 3.229(3) | 144.6 | N3-H3D...S1 |
| 0.91 | 2.28 | 3.180(3) | 171.8 | N3-H3B...S3 |
| 0.91 | 2.88 | 3.319(3) | 110.8 | N3-H3D...S4 |
| 0.91 | 2.09 | 2.970(4) | 162.1 | N3-H3C...O12 |
| 0.91 | 2.85 | 3.288(3) | 111.0 | N4-H4F...S1 |
| 0.91 | 2.27 | 3.174(3) | 171.3 | N4-H4D...S2 |
| 0.91 | 2.47 | 3.255(3) | 144.7 | N4-H4F...S4 |
| 0.91 | 2.04 | 2.911(4) | 160.4 | N4-H4E...O2 |

** Primed atoms are related by symmetry*


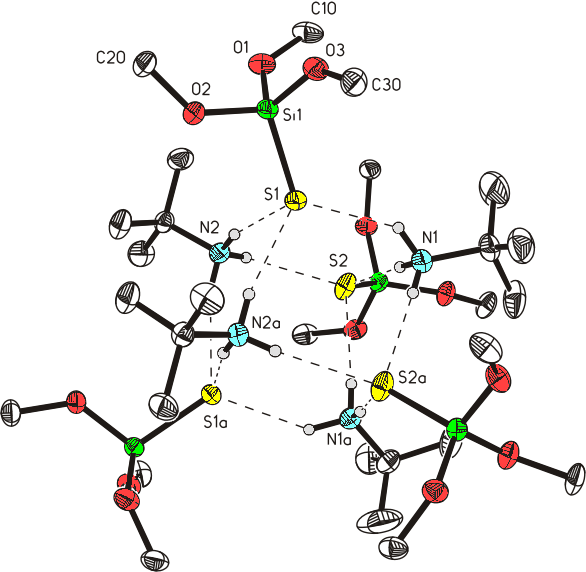


Fig. 1 Ortep plot illustrating the geometry and supramolecular structure of 1. For clarity, all H atoms, except N–H, have been omitted and within (Bu*t*O)3SiS- groups only tertiary carbon atoms are shown. Hydrogen bonds are sketched as broken lines. Thermal ellipsoids 30 %.


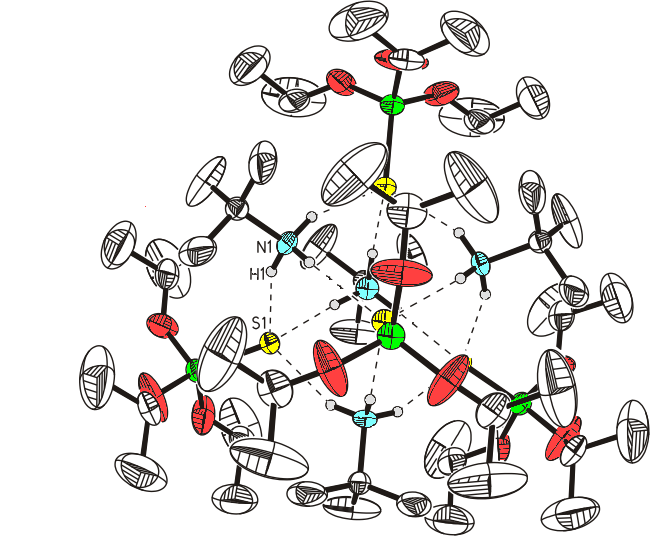


Fig. 2 Ortep plot illustrating the geometry and supramolecular structure of 2. For clarity, all H atoms, except N–H, have been omitted. Hydrogen bonds are sketched as broken lines. Thermal ellipsoids 30 %.


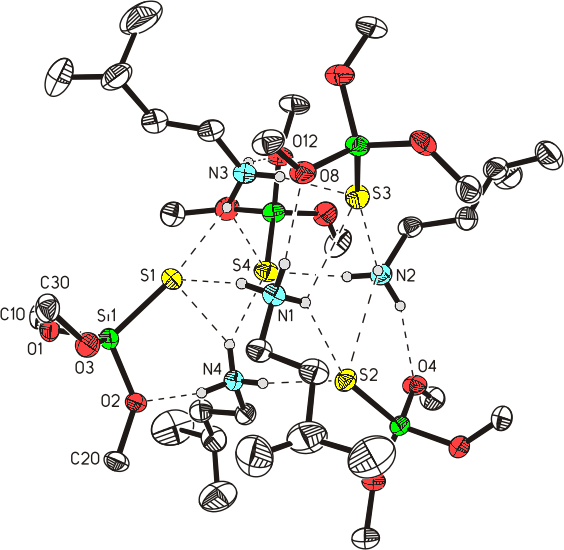


Fig. 3 Ortep plot illustrating the geometry and supramolecular structure of 3. For clarity, all H atoms, except N–H, have been omitted and within (Bu*t*O)3SiS- groups only tertiary carbon atoms are shown. Hydrogen bonds are sketched as broken lines. Thermal ellipsoids 30 %.
